# Supplementary material for: Conductive metal-covalent organic frameworks as novel catalytic platforms for reduction of nitrate to ammonia
Source: Royal Society of Chemistry journal article supplement (doi:10.1039/d3gc01914d), 2023-01-01
Supplement: d3gc01914d1.pdf [file d3gc01914d1.pdf]

## Supporting Information

### **Conductive Metal-Covalent Organic Frameworks as Novel Catalytic Platform for Reduction of Nitrate to Ammonia**

*Hao Huang, Kaiying Wang\**

H. Huang and Prof. Kaiying Wang  
Department of Microsystems  
University of South-Eastern Norway  
Borre 3184, Norway  
E-mail: Kaiying.Wang@usn.no

## Experimental Section

### *physical characterization*

Powder X-ray diffraction (XRD) patterns of various c-MCOFs nanosheets were measured by Bruker D8 Advance with Cu-K $\alpha$  radiation (40 KV, 40 mA,  $\lambda = 0.15418$  nm). Bruker ASCEND NMR Spectrometer (400 MHz) was employed for their nuclear magnetic resonance (NMR) spectra. HITACHI SU8020 field-emission electron microscope was used to record the scanning electron microscopy (SEM) images for investigating the morphology and the energy dispersive X-Ray spectroscopy (EDS) mapping for analyzing the element composition. Meanwhile, the transmission electron microscopy (TEM) images were obtained by TECNAI F20 transmission electron microscope. X-ray photoelectron spectroscopy (XPS) technology was utilized to investigate the chemical states of various c-MCOFs samples by PHI-5000 X-ray photoelectron spectrometer. PerkinElmer Lambda 650 spectrophotometer was used for measure the concentrations of electrochemical products in electrolyte by an ultraviolet-visible (UV-vis) chromogenic method.

### *electrochemical measurements*

The nitrate reduction to Ammonia (NRA) properties of various c-MCOFs samples were investigated by electrochemical workstation (CHI 760E; Shanghai) with standard three-electrode system. Carbon papers, coated by c-MCOFs samples, were used as working electrode; graphite rod and saturated calomel electrode (SCE) were worked as the counter electrode and reference electrode, respectively. In this work, a typical H-type electrolytic cell was utilized; in particular, Nafion 117 membrane was employed to separate the cathode and anode in this electrolytic cell. Before electrochemical test, the Nafion 117 membrane need a pre-treatment. The Nafion 117 membrane was boiled in 3% H<sub>2</sub>O<sub>2</sub> for 30 min to remove organic impurities. The membrane surface of Nafion 117 was repeatedly cleaned with deionized water, and then boiled in 0.5 M H<sub>2</sub>SO<sub>4</sub> for another 1 h. The membrane was stored in deionized water for later use. After each electrochemical reaction, the membrane was placed in deionized water for 30 seconds each time for 3 times to remove residual impurities and contaminants on the surface to avoid affecting the results of the next experiment. All SCE potentials were transferred to RHE via the Nernst equation:

$$E_{RHE} = E_{SCE} + 0.244 + 0.059pH \quad (1)$$

In this work, 70 mL of 0.5 M Na<sub>2</sub>SO<sub>4</sub> solution with 0.1 M NaNO<sub>3</sub> is used as electrolyte for the cathode and anode compartments of the N-type electrolytic cell. The entire electrochemical test device was completely sealed with Vaseline and parafilm. Before electrochemical test, the electrolyte was purged with Ar (99.99%) gas for 30 min to remove oxygen. Linear sweep voltammetry (LSV) curves were recorded at a scan rate of 10 mV S<sup>-1</sup> from -0.2 V to -0.7 V to ensure that the polarization curve is stable.

### *Quantification of ammonia*

The concentration of NH<sub>3</sub>, NO<sub>3</sub><sup>-</sup> and NO<sub>2</sub><sup>-</sup> was detected by the chromogenic methods via UV-vis technology in this work. Before UV-vis testing, the electrolytes were diluted to an appropriate concentration within the range of calibration curves. The chromogenic detection methods are as follow:

*Detection of ammonia:* The yield of NH<sub>3</sub> was detected via indophenol blue method. In brief, 1mL of electrolyte (after electrocatalysis) was extracted and diluted to an appropriate concentration in a sample bottle. 2 mL of NaOH solution (1 M) with 5 wt% sodium citrate and 5 wt% salicylic acid was then added to the 2 mL diluted electrolyte. After adding 1 mL of sodium hypochlorite (0.05 M) and 0.2mL of sodium nitroferricyanide (1 wt.%), the mixed solution was standing 2 h for coloration.

the UV-Vis absorption spectrum of these mixed solution was detected for analyzing the concentration of  $\text{NH}_3$ . Additionally, the absorbance calibration curve of  $\text{NH}_3$  were obtained by testing ammonium chloride solutions with different concentrations.

The yield of  $\text{NH}_3$  was calculated following the equation:

$$\text{Yield } \text{NH}_3 = \frac{(C_{\text{NH}_3} \times V)/(t \times A)}{(2)} \quad (2)$$

where  $C_{\text{NH}_3}$  means the  $\text{NH}_3$  concentration,  $V$ : the volume of electrolyte,  $t$ : the electrocatalysis time, and  $A$ : the area of working electrode.

The faradaic efficiency ( $\text{EF}_{\text{NH}_3}$ ) was calculated as follows:

$$\text{FE}_{\text{NH}_3} = \frac{(3F \times C_{\text{NH}_3} \times V)/(17 \times Q)}{(3)} \quad (3)$$

where  $F$  was the Faraday constant ( $96485 \text{ C mol}^{-1}$ ),  $C_{\text{NH}_3}$ : the  $\text{NH}_3$  concentration, and  $Q$ : the total charge in the electrocatalytic process

*Detection of nitrate:* In this work, 200  $\mu\text{L}$  of electrolyte (after electrocatalysis) was extracted and diluted to an appropriate concentration in a sample bottle. 100  $\mu\text{L}$  of  $\text{HCl}$  solution (1 M) and 10  $\mu\text{L}$   $\text{H}_2\text{SO}_4$  (0.08 M) were then added into the 5 mL diluted electrolyte. After standing 15 minutes, the UV-Vis absorption spectrum of these mixed solution was detected for analyzing the concentration of  $\text{NO}_3^-$ . The final absorbance of  $\text{NO}_3^-$  was confirmed by the following equation:

$$A = A_{220-2} A_{275} \quad (4)$$

Where  $A$  means the strength of the  $\text{NO}_3^-$  absorbance in UV-Vis spectrum,  $A_{220}$ : the absorption strength at the wavelength of 220 nm,  $A_{275}$ : the absorption strength at the wavelength of 270 nm.

The absorbance calibration curve of  $\text{NO}_3^-$  were obtained by testing sodium nitrate solutions with different concentrations.

*Determination of nitrite:* 1 mL of electrolyte (after electrocatalysis) was extracted and diluted to an appropriate concentration in a sample bottle. 100 mg of N-(1-naphthyl) ethylenediamine dihydrochloride, 2g of aminobenzenesulfonamide, and 5 mL of phosphoric acid were added into 25 mL of deionized water and mixed thoroughly as the color reagent. 0.1 mL of color reagent was added into 5 mL of diluted electrolyte. After standing 20 min, the UV-Vis absorption spectrum of these mixed solution was detected for analyzing the concentration of  $\text{NO}_2^-$ . The absorbance calibration curve of  $\text{NO}_2^-$  were obtained by testing sodium nitrite solutions with different concentrations.

Note: the chromogenic agent for nitrite is very unstable, which should be used as new configuration.

### **TOF calculation:**

The TOF values were estimated as the following formula:

$$\text{TOF} = \frac{\text{Number of total ammonia turnover} / \text{cm}^2}{\text{Number of active sites} / \text{cm}^2} \quad (5)$$

The number of total ammonia turnovers was calculated from the current density and the Faraday efficiency by the following equation:

$$\text{Number of } \text{NH}_3 = \left( \frac{j}{\text{cm}^2} \right) (\text{FE}_{\text{NH}_3}) \left( \frac{1 \text{ C s}^{-1}}{1000 \text{ mA}} \right) \left( \frac{1 \text{ mol e}^-}{96485.3 \text{ C}} \right) \left( \frac{1 \text{ mol } \text{NH}_3}{8 \text{ mol e}^-} \right) \left( \frac{6.022 \times 10^{23} \text{ } \text{NH}_3 \text{ molecules}}{1 \text{ mol } \text{NH}_3} \right) \quad (6)$$

The number of active sites was regarded as the number of surface sites, and calculated by the following formula:

$$\text{umber of active sites} = \left( \frac{\text{Number of metal site / unit cell}}{\frac{\text{Volume}}{\text{unit cell}}} \right)^{\frac{2}{3}} \quad (7)$$

Finally, the plot of current density can be converted into a TOF plot according to the following formula:

$$TOF = \frac{(\text{Number of } NH_3) * |J|}{\text{Number of active sites} * A_{ECSA}} \quad (8)$$

### ***<sup>15</sup>N Isotope Labeling Experiments***

In order to confirm the source of  $NH_3$ ,  $Na^{15}NO_3$  ( $\geq 98$  atom%  $^{15}N$ ) was employed as  $^{15}N$  labeling N-source. 0.1 M  $Na_2SO_4$ , adjusted to pH=11 by 0.1 M KOH, was used as the electrolyte and 0.1 M  $Na^{15}NO_3$  was as the  $^{15}N$  Isotope Labeled reactant. After 4 h electroreduction, the electrolyte in cathode compartment was taken out and adjusted pH value to 2 by 4M  $H_2SO_4$  solution (4M). Then, deuterium oxide ( $D_2O$ ) was added into the weak acid electrolyte for the further  $^1H$  NMR detection with 600MHz.

### ***DFT calculations***

To investigate the electroreduction mechanism of nitrate, the single-layered Mo-HATN-MCOFs, Ni-HATN-MCOFs and HATN-MCOFs slabs were established, respectively. DFT calculations of these slabs were computed by using a generalized gradient approximation (GGA) of exchange-correlation functional in the Perdew, Burke, and Ernzerhof (PBE). GGA+U functional was used with an additional Coulomb potential  $U = 2$  eV (Mo) and 3.1 eV (Ni) applied on states of 3d-orbit. A plane-wave energy cut off of 500 eV was used together with norm-conserving pseudopotentials, and the Brillouin zone was sampled with a  $2 \times 2 \times 1$  Monkhorst–Pack grid. The structure was fully optimized until the force on each atom is less than  $10^{-3}$  eV/Å. To avoid periodic interaction, a vacuum layer of 30 Å was incorporated into the slabs. The free energy ( $\Delta G$ ) was computed from

$$\Delta G = \Delta E + ZPE - T\Delta S \quad (9)$$

where  $\Delta E$  was the total energy,  $ZPE$  was the zero-point energy, the entropy ( $\Delta S$ ) of each adsorbed state were yielded from DFT calculation, whereas the thermodynamic corrections for gas molecules were from standard tables.

## Results and Discussion

Figure S1. The chemical structure of HATN.

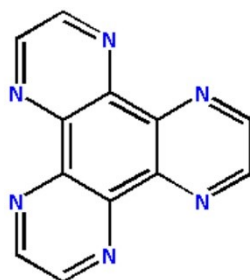

Figure S2. The chemical structure of (a) 1,2,4,5-tetraaminobenzene tetrahydrochloride and (b) hexaketocyclohexane

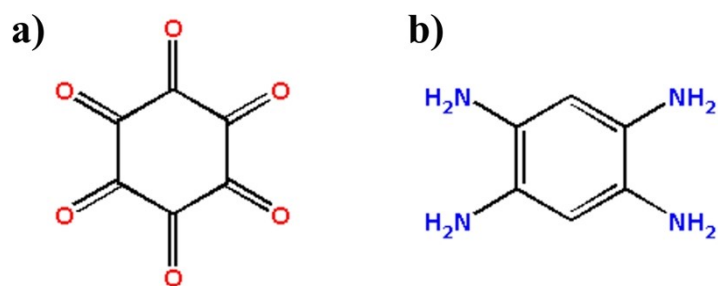

Figure S3. The XRD patterns of Mo-HATN-COFs, Ni-HATN-COFs and HATN-COFs samples.

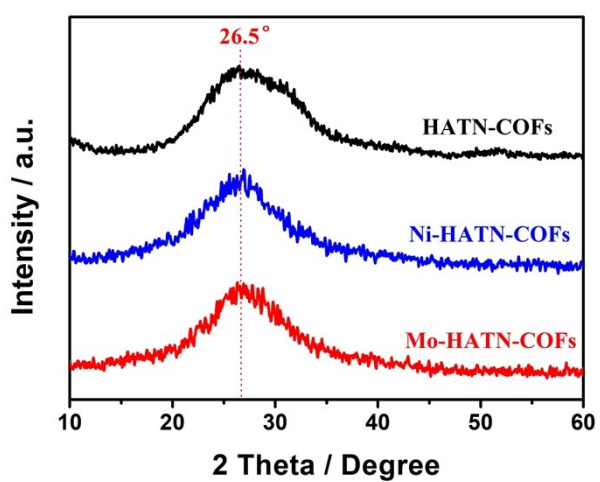

Figure S4. (a) The structure model of Mo-HATN-COFs. (b) The PDOS of Mo atoms in Mo-HATN-COFs.

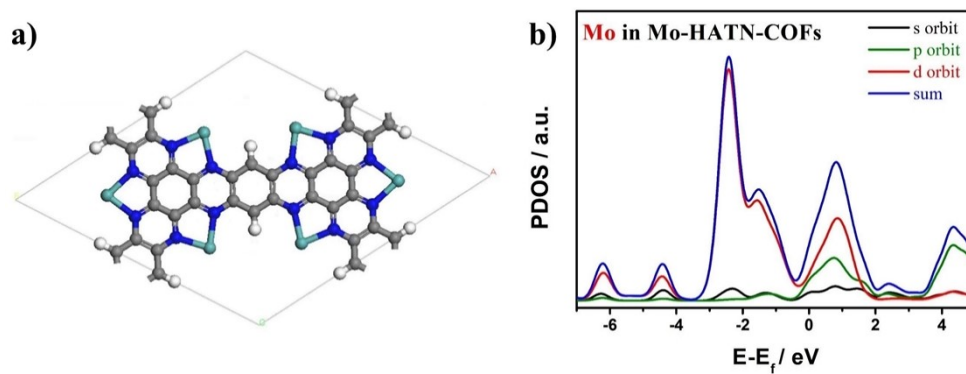

Figure S5. (a) The structure model of Ni-HATN-COFs. (b) The PDOS of Ni atoms in Ni-HATN-COFs.

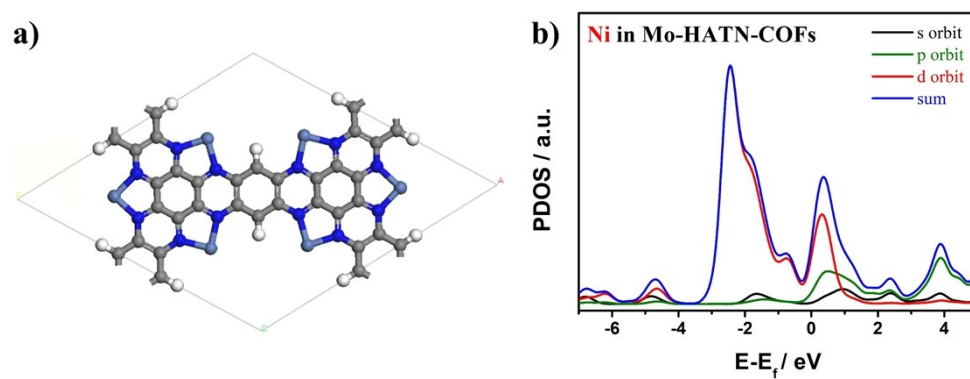

Figure S6. The d-orbit of Mo-HATN-COFs and Ni-HATN-COFs.

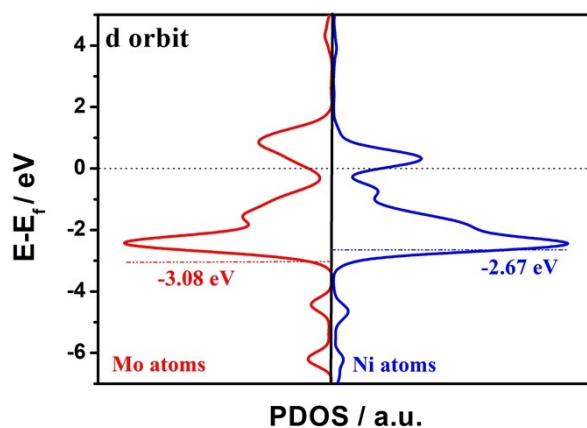

Figure S7. Nyquist plots of Mo-HATN-COFs and HATN-COFs.

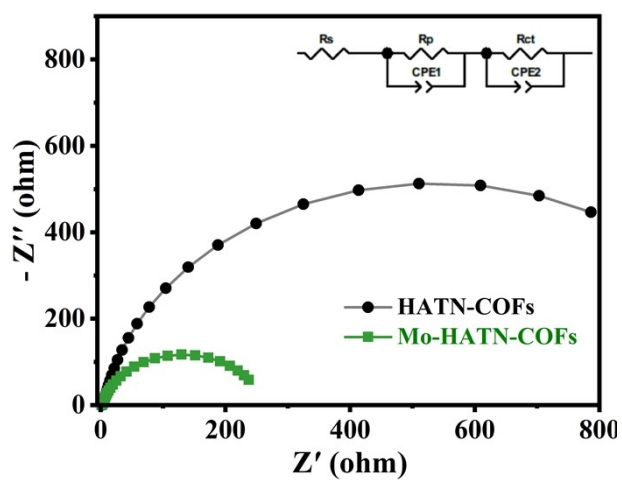

Figure S8. (a) The XRD pattern and (b) SEM image of NaCl template.

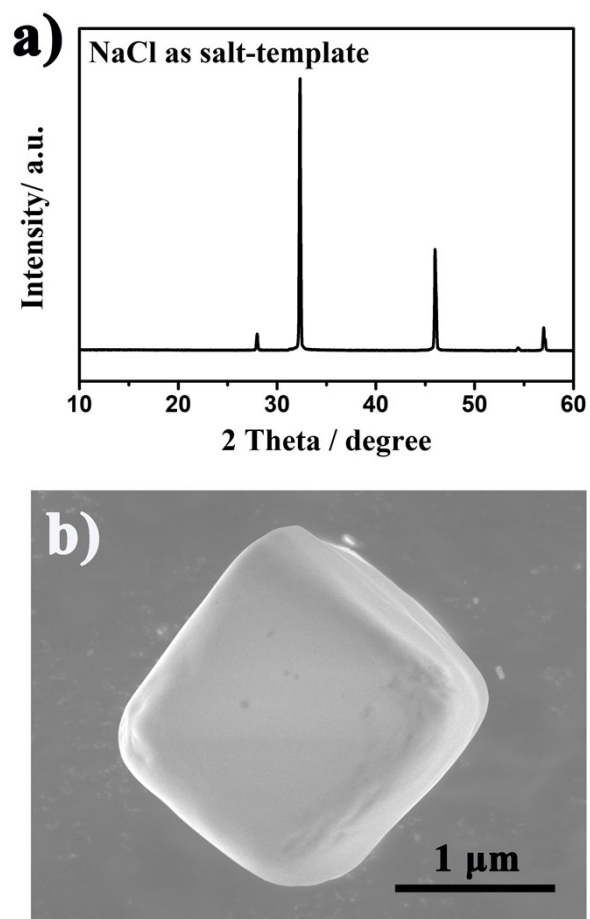

Figure S9. The high-resolution SEM image of Mo-HATN-COFs.

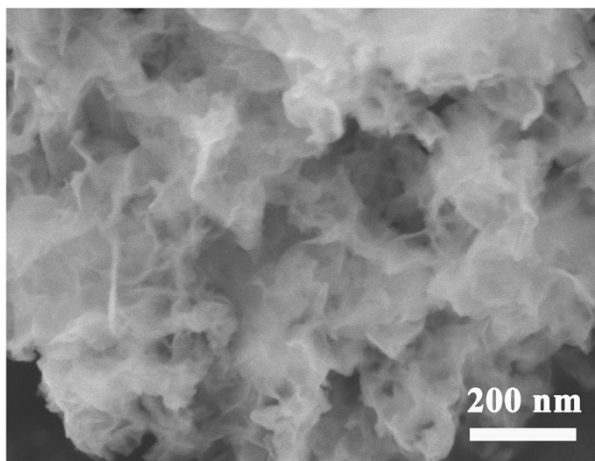

Figure S10. (a) The N<sub>2</sub> adsorption-desorption isotherm and (b) pore size distribution curve of Mo-HATN-COFs nanosheets

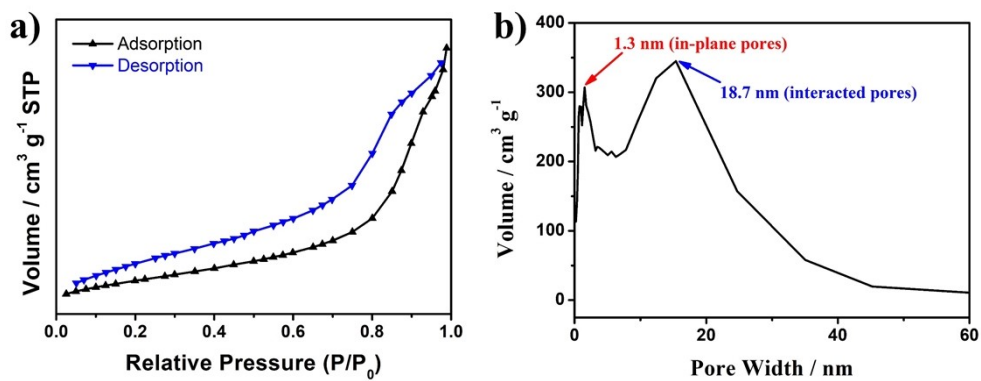

Figure S11. The SEM image of HATN-COFs nanosheets.

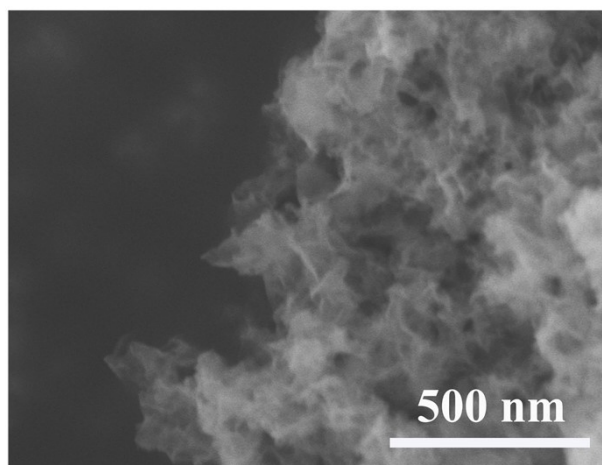

Figure S12. The high-resolution TEM image of Ni-HATN-COFs nanosheets.

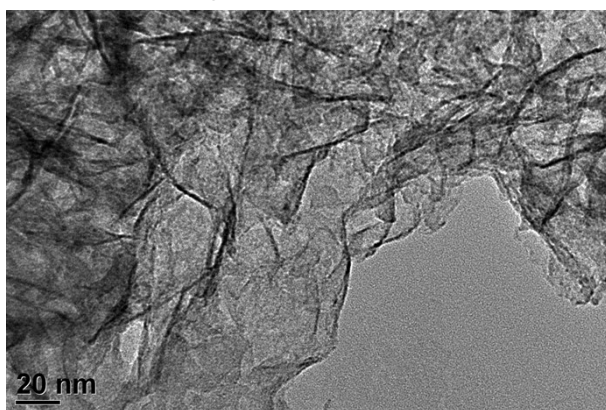

Figure S13. The high-resolution TEM image of HATN-COFs nanosheets.

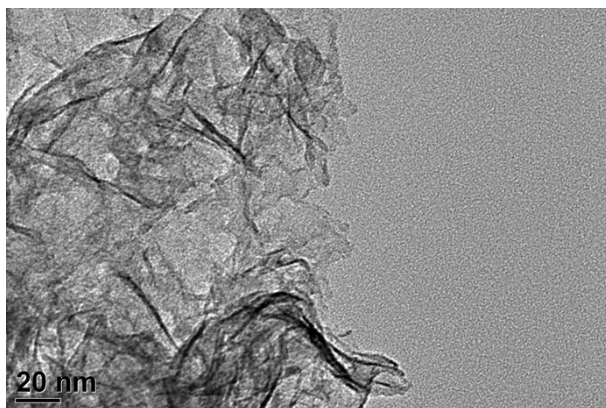

Figure S14. XPS spectra of (a) Mo 3d, (b) N 1s and (c) C 1s in Mo-HATN-COFs.

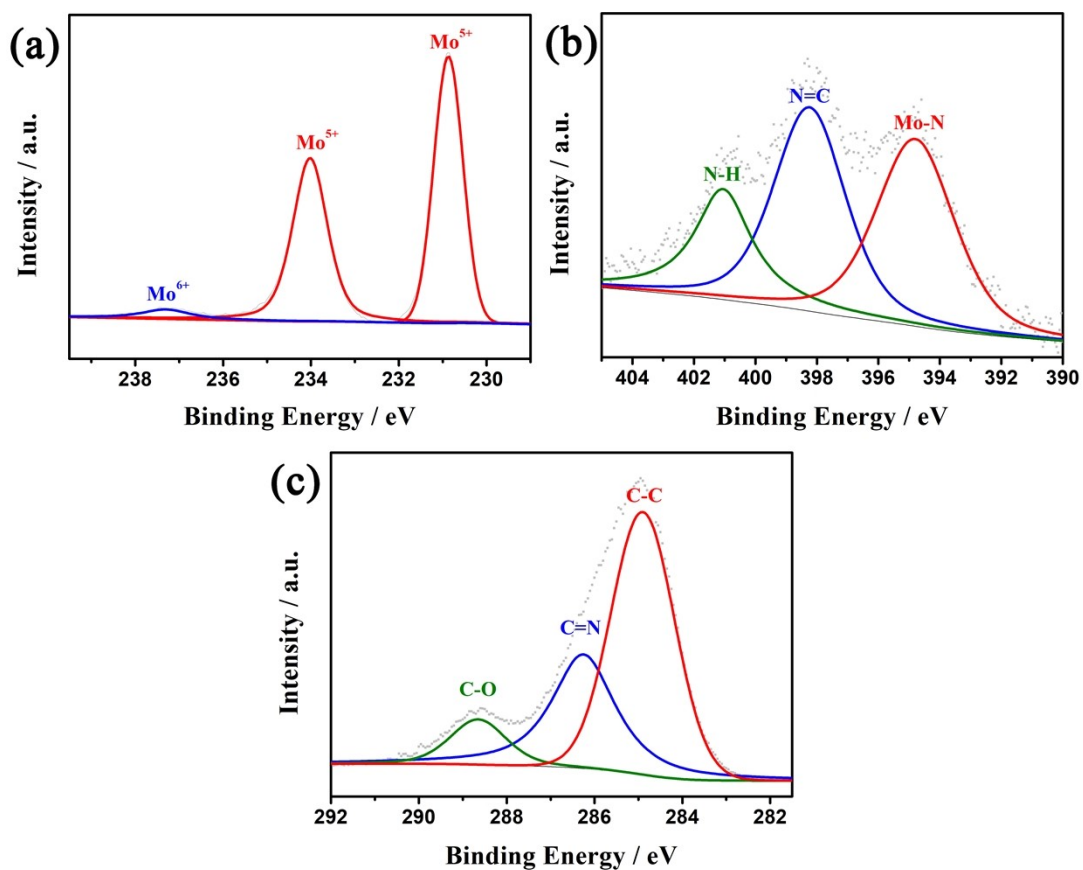

Figure S15. The diagram of the electrocatalytic reactor for nitrate reduction.

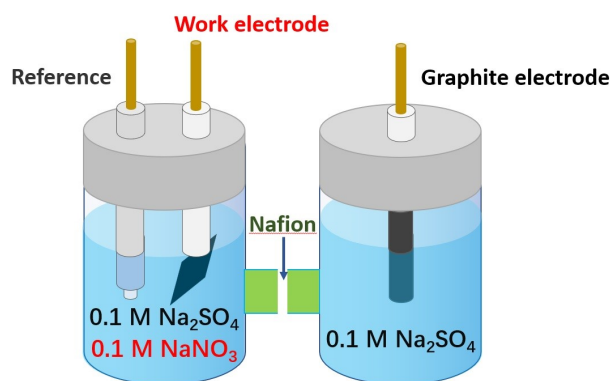

Figure S16. The SEM image of the surface of Mo-HATN-COFs electrode.

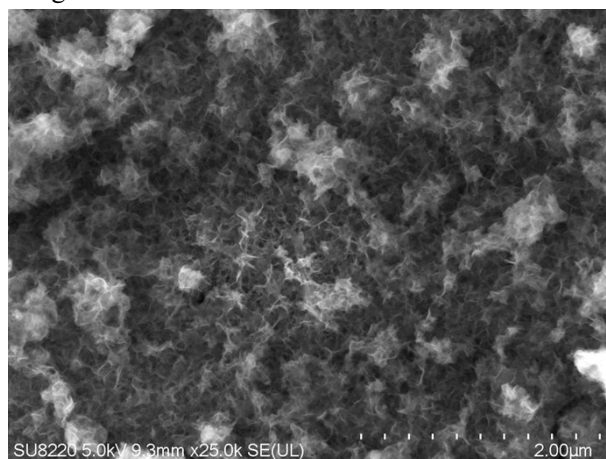

Figure S17. The SEM image of the surface of Ni-HATN-COFs electrode.

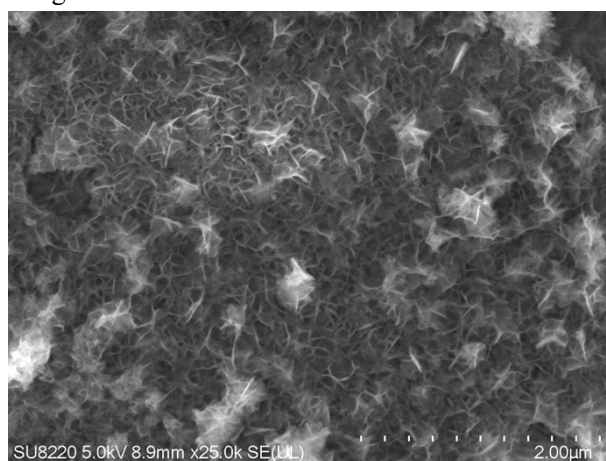

Figure S18. The SEM image of the surface of HATN-COFs electrode.

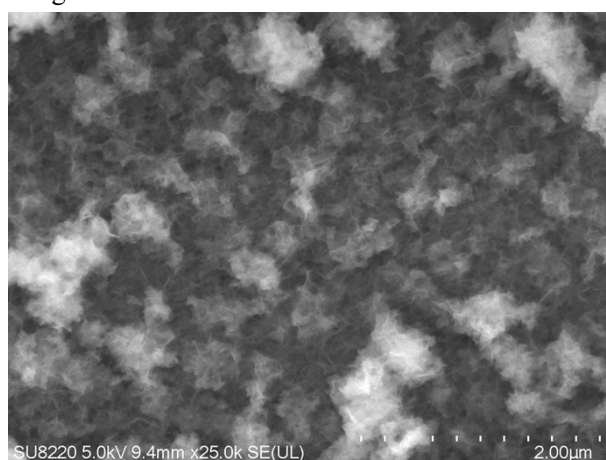

Figure S19. The LSV curves of Ni-HATN-COFs with and without 0.1 M NaNO<sub>3</sub>.

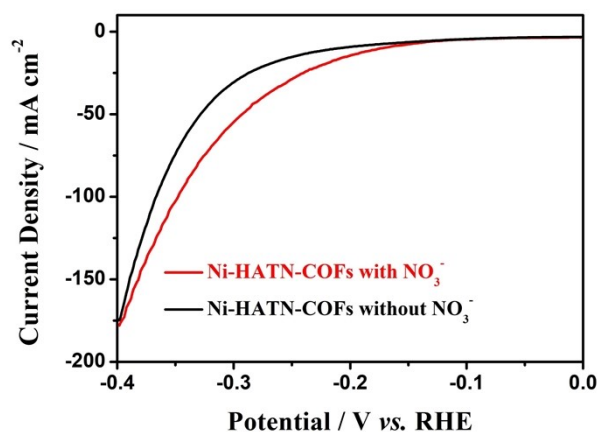

Figure S20. (a) The UV-vis absorption spectra with various NH<sub>4</sub><sup>+</sup> concentration in 0.5 M Na<sub>2</sub>SO<sub>4</sub>. b) The calibration curve used for estimation of the NH<sub>4</sub><sup>+</sup> concentration.

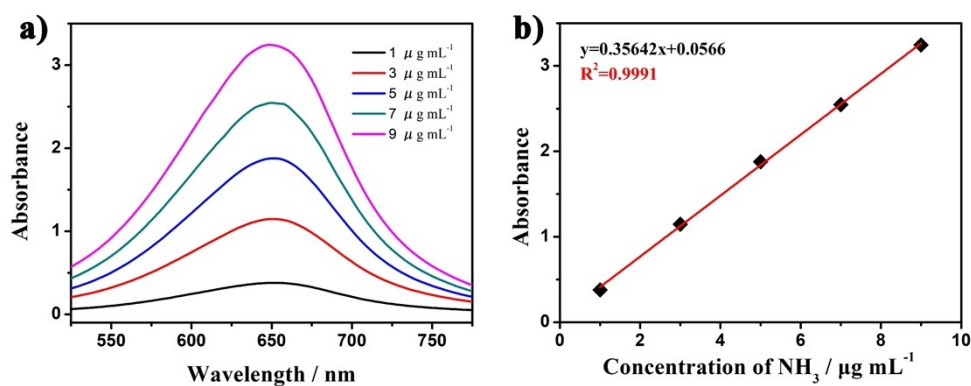

Figure S21. (a) The UV-vis absorption spectra with various NO<sub>2</sub><sup>-</sup> concentration. b) The calibration curve used for estimation of the NO<sub>2</sub><sup>-</sup> concentration.

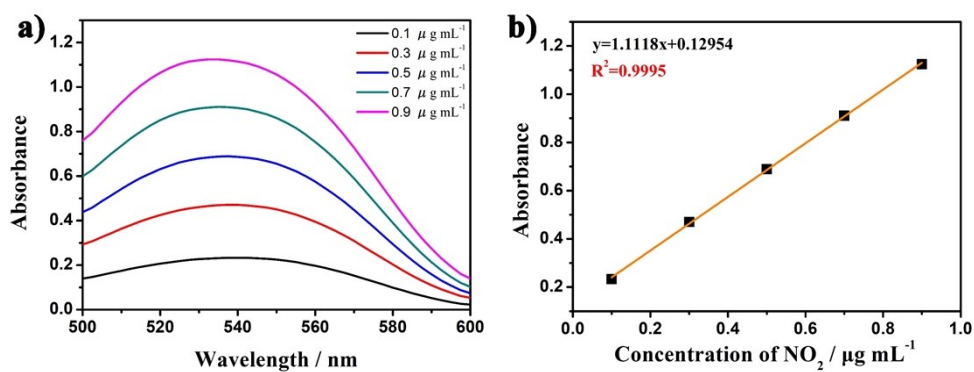

Figure S22. Potential-dependent yield rate and FE of ammonia over bulk Mo-HATN-COFs.

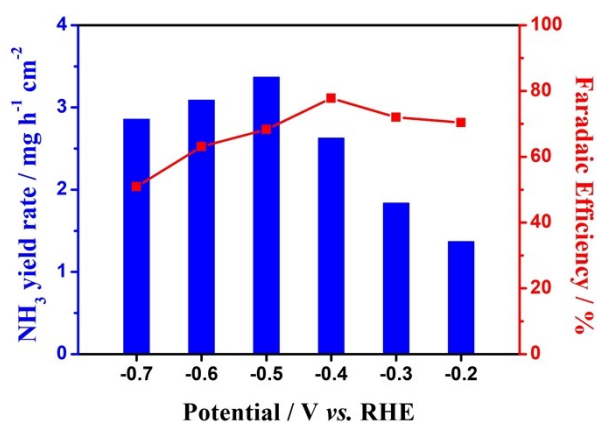

Figure S23. Potential-dependent yield rate and FE of ammonia over Ni-HATN-COFs nanosheets.

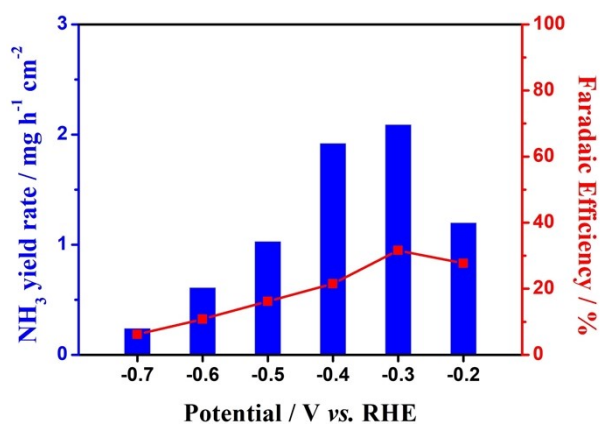

Figure S24. Potential-dependent yield rate and FE of ammonia over HATN-COFs nanosheets.

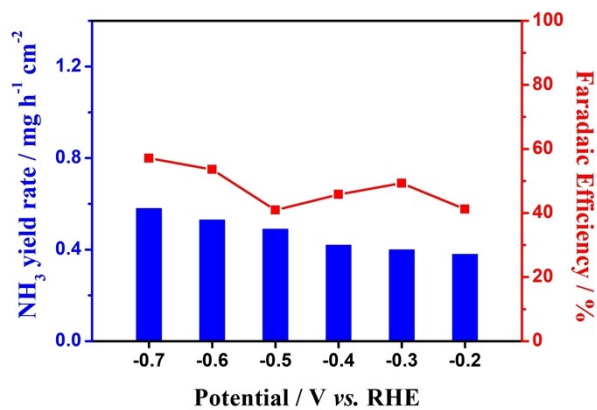

Figure S25. The ammonia yield rate of electrocatalysis over Mo-HATN-COFs within/without 0.1 M  $\text{NaNO}_3$  electrolyte, and without applied potential in the presence of  $\text{NaNO}_3$ .

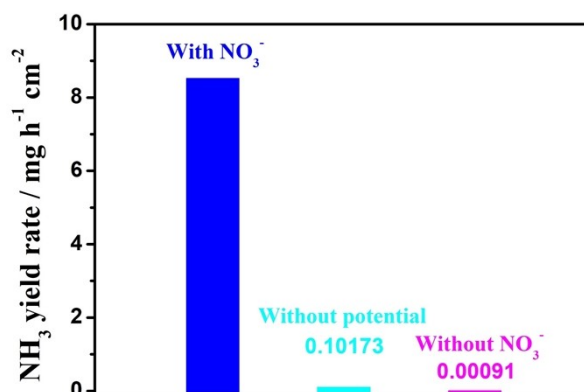

Figure S26. The XRD pattern of Mo-HATN-COFs after 10 h electrochemical reduction.

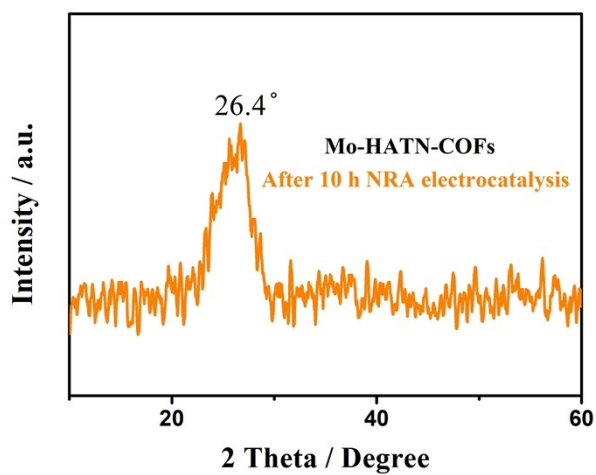

Figure S27. Structural models of single-layered Mo-HATN-COFs during NRA process (Mo cyan green atoms, N blue atoms, O red atoms and H white atoms).

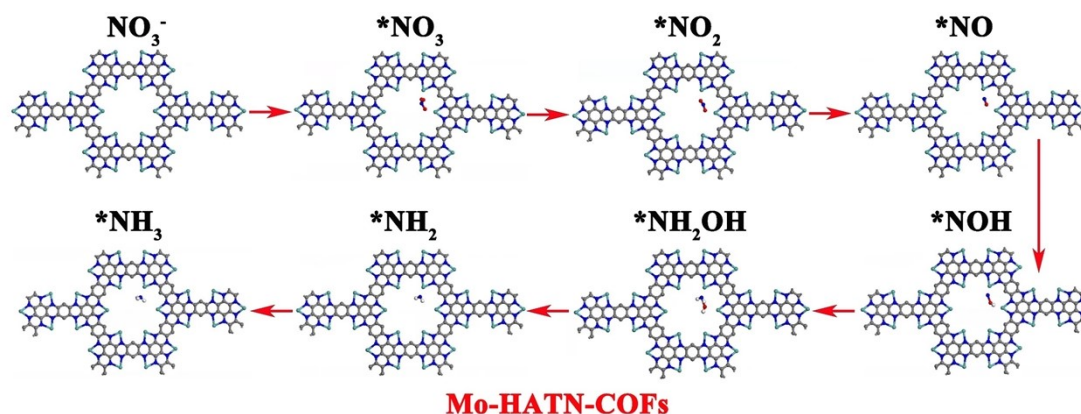

Figure S28. Structural models of single-layered Ni-HATN-COFs during NRA process (Ni light blue atoms, N blue atoms, O red atoms and H white atoms).

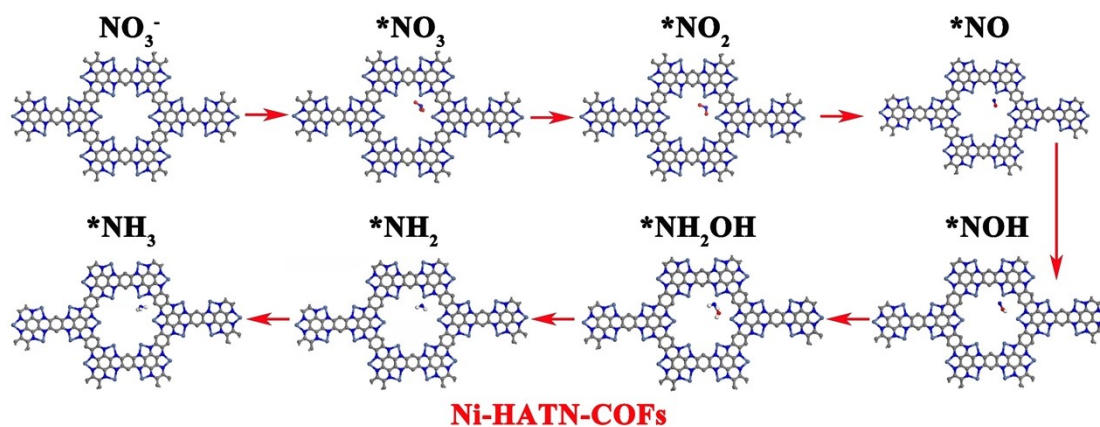

Figure S29. Structural models of single-layered HATN-COFs during NRA process (N blue atoms, O red atoms and H white atoms).

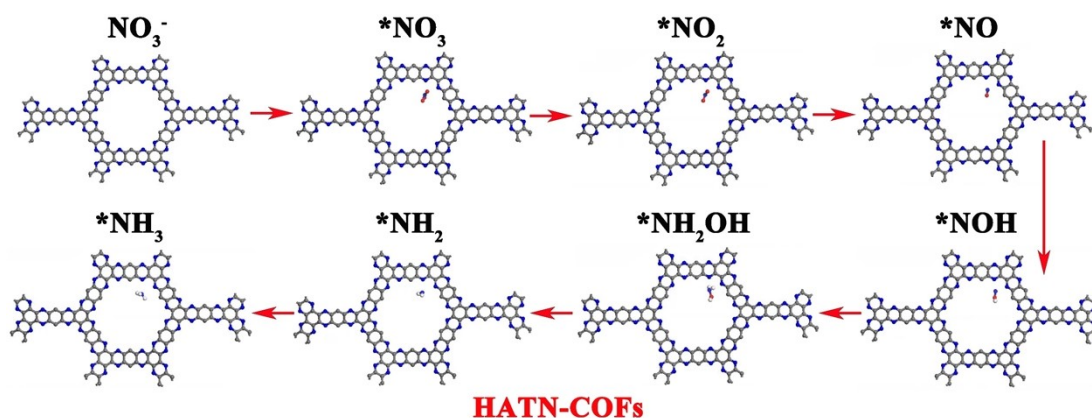

Figure S30. The charge density difference image of single-layered HATN-COFs with NO model

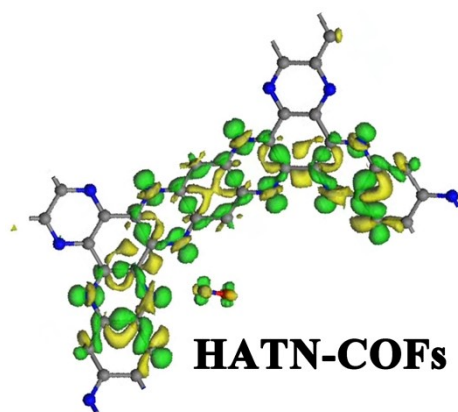

**Table S1. The crystal structure of Mo-HATN-COFs, Ni-HATN-COFs and HATN-COFs**

| Sample       | Symmetry | a=b (Å) | c(Å) | $\alpha=\beta$ (°) | $\gamma$ (°) |
|--------------|----------|---------|------|--------------------|--------------|
| Mo-HATN-COFs | P6/mmm   | 16.54   | 3.47 | 90                 | 120          |
| Ni-HATN-COFs | P6/mmm   | 16.48   | 3.48 | 90                 | 120          |
| HATN-COFs    | P6/mmm   | 16.68   | 3.47 | 90                 | 120          |

**Table. S2** Comparison of electrocatalytic NRA performance of Mo-HATN-COFs with other MCOFs, Ni-MOFs electrocatalysts.

| Sample                      | Electrolyte                                              | Yield of $\text{NH}_3$                                    | FE (%) | Reference |
|-----------------------------|----------------------------------------------------------|-----------------------------------------------------------|--------|-----------|
| NiPr-TPA-COF                | 0.5 M $\text{Na}_2\text{SO}_4$ + 0.1 M $\text{NaNO}_3$   | $2.5 \text{ mg h}^{-1} \text{ cm}^{-2}$                   | ~90    | [1]       |
| Ce MOF-Cu                   | 0.5 M $\text{Na}_2\text{SO}_4$ + 5 mM $\text{NaNO}_3$    | $66 \mu\text{mol h}^{-1} \text{ cm}^{-2}$                 | 85.5   | [2]       |
| Cu@CuHHTP                   | 0.5 M $\text{Na}_2\text{SO}_4$ + 500 ppm $\text{NO}_3^-$ | $1.84 \text{ mg h}^{-1} \text{ cm}^{-2}$                  | 67.55  | [3]       |
| RuNi-MOF                    | 0.1 M $\text{Na}_2\text{SO}_4$ + 50 ppm $\text{NO}_3^-$  | $274 \mu\text{g h}^{-1} \text{ mg}^{-1}_{\text{cat}}$     | 73     | [4]       |
| Ni-MOF                      | 0.1 M $\text{Na}_2\text{SO}_4$ + 1.5 g/L $\text{NaNO}_3$ | $110.13 \text{ ug h}^{-1} \text{ cm}^{-2}$                | 12.6   | [5]       |
| $\text{Fe}_2\text{Co}$ -MOF | 0.05 M $\text{H}_2\text{SO}_4$ + 50 g/L $\text{KNO}_3$   | $2686.33 \mu\text{g h}^{-1} \text{ mg}^{-1}_{\text{cat}}$ | 90.55  | [6]       |
| Zr-MOF                      | 0.1 M $\text{Na}_2\text{SO}_4$ + 500 ppm $\text{NO}_3^-$ | $287.31 \mu\text{mol h}^{-1} \text{ cm}^{-2}$             | 58.1   | [7]       |
| UiO-CuZn                    | 0.5 M $\text{Na}_2\text{SO}_4$ + 200 ppm $\text{NO}_3^-$ | $0.228 \text{ mmol h}^{-1} \text{ g}^{-2}$                | 91.4   | [8]       |
| NiPc-CNT                    | 361.1mg/L $\text{KNO}_3$                                 | —                                                         | 86.8   | [9]       |
| CuNi/NC                     | 0.1 M PBS + 50ppm                                        | —                                                         | 79.6   | [10]      |
| <b>Mo-HATN-COFs</b>         | 0.1 M $\text{Na}_2\text{SO}_4$ + 0.1 M $\text{NaNO}_3$   | $8.52 \text{ mg h}^{-1} \text{ cm}^{-2}$                  | 91.3   | This work |

References:

[1] F. Lv, M. Sun, Y. Hu, J. Xu, W. Huang, N. Han, B. Huang, Y. Li, *Energy Environ. Sci.*, **2023**, *16*, 201.

- [2] Y.-T. Xu, M.-Y. Xie, H. Zhong and Y. Cao, *ACS Catal.*, **2022**, *12*, 8698-8706.
- [3] X. Zhu, H. Huang, H. Zhang, Y. Zhang, P. Shi, K. Qu, S.-B. Cheng, A.-L. Wang, Q. Lu, *ACS Appl. Mater. Interfaces*, **2022**, *14*, 32176-32182.
- [4] J. Qin, K. Wu, L. Chen, X. Wang, Q. Zhao, B. Liu and Z. Ye, *J. Mater. Chem. A*, **2022**, *10*, 3963-3969.
- [5] F. Pan, J. Zhou, T. Wang, Y. Zhu, H. Ma, J. Niu, C. Wang, *J. Colloid. Interf. Sci.*, **2023**, *638*, 26-38.
- [6] Y. Lv, S.-W. Ke, Y. Gu, B. Tian, L. Tang, P. Ran, Y. Zhao, J. Ma, J.-L. Zuo, M. Ding, *Angew. Chem. Int. Ed.*, **2023**, *62*, e202305246.
- [7] M. Jiang, J. Su, X. Song, P. Zhang, M. Zhu, L. Qin, Z. Tie, J.-L. Zuo, Z. Jin, *Nano Lett.*, **2022**, *22*, 2529-2537.
- [8] Z. Wang, S. Liu, M. Wang, L. Zhang, Y. Jiang, T. Qian, J. Xiong, C. Yang, C. Yan, *ACS Catal.*, **2023**, *13*, 9125-9135.
- [9] Y. Li, L. Ren, Z. Li, T. Wang, Z. Wu, Z. Wang, *ACS Appl. Mater. Interfaces*, **2022**, *14*, 53884-53892.
- [10] Y. Liu, B. Deng, K. Li, H. Wang, Y. Sun, F. Dong, *J. Colloid Interface Sci.*, **2022**, *614*, 405-414.
